# Supplementary material for: Metal content and kinetic properties of yeast RNA lariat debranching enzyme Dbr1
Source: PubMed Central journal article supplement — RNA. 2022 Jul;28(7):927–36. doi: 10.1261/rna.079159.122 (PMC9202583; doi:10.1261/rna.079159.122), 2022-07
Supplement: supp_079159.122_Supplemental_Table_1.pdf [file supp_079159.122_Supplemental_Table_1.pdf]

### Supplemental Table 1. metal content of water, media, and human tissue

|                      | <b>Fe</b> | <b>Mg</b> | <b>Ca</b> | <b>Mn</b> | <b>Co</b> | <b>Ni</b> | <b>Cu</b> | <b>Zn</b> |
|----------------------|-----------|-----------|-----------|-----------|-----------|-----------|-----------|-----------|
| deionized water      | 0.000     | 0.833     | 5.112     | 0.015     | 0.000     | 0.000     | 0.000     | 0.000     |
| ultrapure water      | 0.000     | 0.000     | 0.925     | 0.010     | 0.000     | 0.000     | 0.000     | 0.000     |
| Terrific Broth       | 24        | 237       | 290       | 0.9       | 1.9       | 0.1       | 1.3       | 56        |
| Insect Media         | 7.6       | 6253      | 4591      | 0.3       | 0.6       | 0.1       | 1.1       | 11        |
| normal human cervix* | 319       | nr        | 1,782     | 6         | nr        | nr        | 29        | 295       |

*Table values are micromolar ( $\mu\text{M}$ ). nr=not-reported*

*\*From Cuzhi, H. 2003*
