# Supplementary material for: Metal content and kinetic properties of yeast RNA lariat debranching enzyme Dbr1
Source: PubMed Central journal article supplement — RNA. 2022 Jul;28(7):927–36. doi: 10.1261/rna.079159.122 (PMC9202583; doi:10.1261/rna.079159.122), 2022-07
Supplement: supp_079159.122_Supplemental_Table_2.pdf [file supp_079159.122_Supplemental_Table_2.pdf]

## Supplemental Table 2. ICP-MS operating conditions and instrument parameters

|                                                      |                                                                 |
|------------------------------------------------------|-----------------------------------------------------------------|
| <b>ICP-MS Instrument</b>                             | Agilent 7500ce                                                  |
| <b>Plasma Conditions</b>                             |                                                                 |
| Nebulizer                                            | PFE microflow with 90 $\mu$ L/min uptake rate                   |
| Nebulizer pump (rps)                                 | 0.1                                                             |
| Spray Chamber                                        | Scott-type (quartz) with Peltier cooling (2°C)                  |
| Sampling Depth (mm)                                  | 8                                                               |
| RF power (W)                                         | 1600                                                            |
| RF Matching (V)                                      | 1.7                                                             |
| Gas flows (L/min)                                    | Carrier 0.96; Make-up 0.25                                      |
| <b>Cones</b>                                         | Ni                                                              |
| <b>Reaction cell (ORS) modes and masses measured</b> |                                                                 |
| H <sub>2</sub> mode (5.3 mL/min)                     | 56                                                              |
| No gas mode                                          | 24, 44, 55, 59, 60, 63, 66, 114                                 |
| Internal stds                                        | <b>9, 45, 72, 115</b>                                           |
| <b>Detection system</b>                              | Dual stage (pulse & analog) discrete dynode electron multiplier |
| <b>Data Acquisition</b>                              |                                                                 |
| Scan mode                                            | Peak hopping                                                    |
| Points across peak                                   | 3                                                               |
| Integration per mass (sec)                           | 0.100                                                           |
| Replicates                                           | 3                                                               |

•
