# Supplementary figures and images for: Metal content and kinetic properties of yeast RNA lariat debranching enzyme Dbr1
Source: PubMed Central journal article supplement — RNA. 2022 Jul;28(7):927–36. doi: 10.1261/rna.079159.122 (PMC9202583; doi:10.1261/rna.079159.122), 2022-07

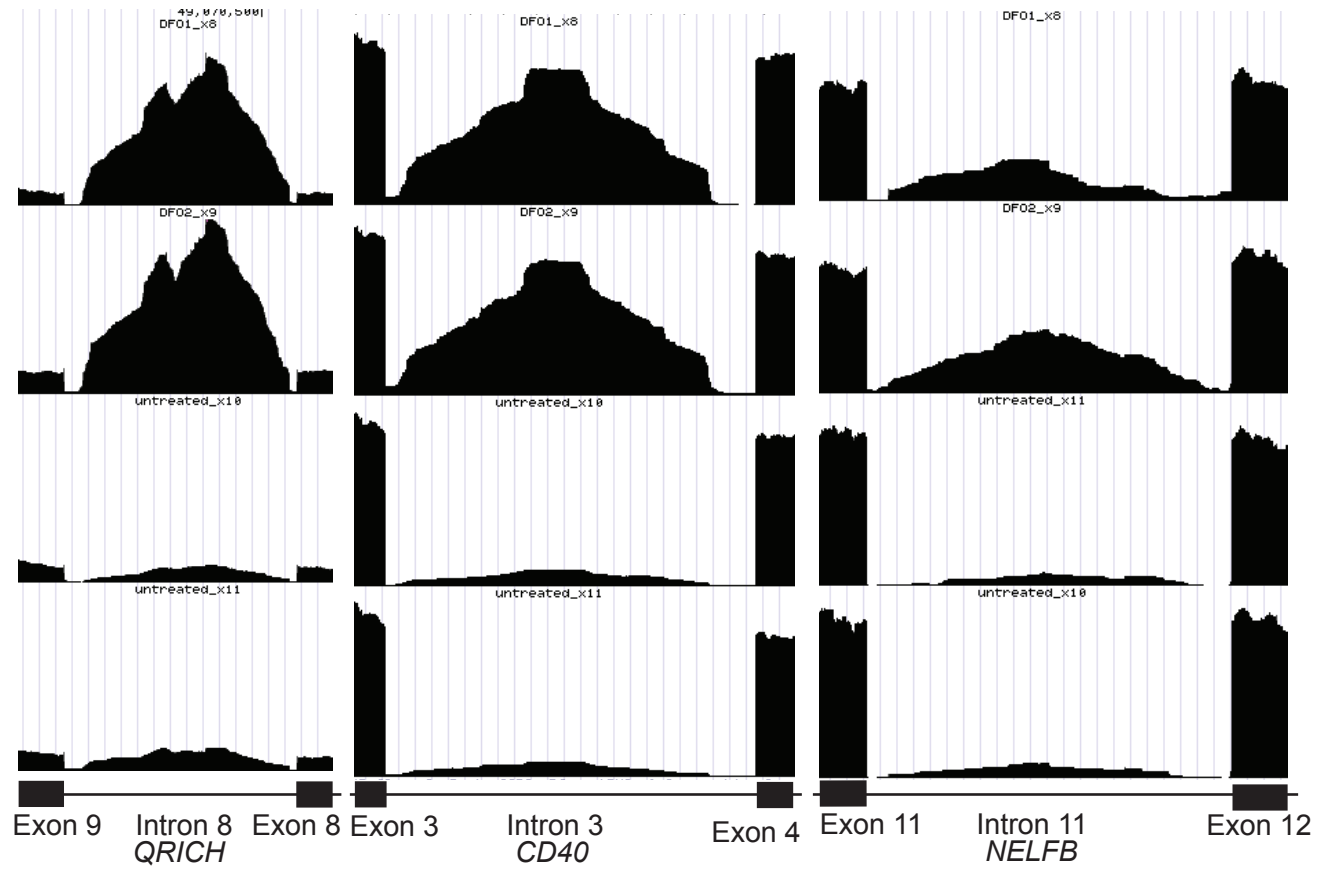

Supplement: supp_079159.122_Supplemental_Figure_S1.pdf [file supp_079159.122_Supplemental_Figure_S1.pdf]
